# Supplementary material for: The Effect of Water Deficit on Two Greek Vitis vinifera L. Cultivars: Physiology, Grape Composition and Gene Expression during Berry Development
Source: MDPI journal article supplement (doi:10.3390/plants10091947), 2021-09-18
Supplement: s1 [file s1]

**Suppl. Table S1.** List of primers used in RT-qPCR analysis

| Gene Name | Gene ID           | NCBI Accession Number | Forward primer              | Reverse primer           |
|-----------|-------------------|-----------------------|-----------------------------|--------------------------|
| VviPAL    | VIT_13s0019g04460 | XM_010660093.2        | GTGAGGGAAGAACTGGGAGC        | TTGTCACACTCTTCACCGGG     |
| VviC4H    | VIT_06s0004g08150 | XM_002266202.3        | GAACCACCTGAACCTCTCCG        | ATCCGAACCTCCACTCCCTGA    |
| VviUFGT   | VIT_04s0023g01290 | JF522529              | TGGTGGCTGACGCATTCAT         | CCCCATCTCTGCTGCCATATC    |
| VviDXS    | VIT_05s0020g02130 | XM_002277883.4        | CCAAGGGCGTTACCAAACAG        | TCAACTTTTGCAGCCAATTCA    |
| VviCCD1   | VIT_13s0064g00840 | NM_001280915          | TGGACAGCATAGCCAAGGTG        | GCTCACGAGGGACAAAGACA     |
| VviLOXA   | VIT_06s0004g01450 | NM_001281094.1        | GCAAATCAAAGGGACAACGCTGTATGG | TGCTTCCACTGCGGCTTCC      |
| VviGGT    | VIT_11s0016g02830 | XM_002280154.3        | TGGCAACAGCTTAGAGGCAGTA      | CCCACCTGCCTTTCTCACAT     |
| VviEF1a   | VIT_06s0004g03240 | XM_002284888.3        | GAACTGGGTGCTTGATAGGC        | AACCAAAATATCCGGAGTAAAAGA |
